# Supplementary material for: Gridded 5-arcmin, simultaneously farm-size- and crop-specific harvested area for 56 countries
Source: Copernicus journal article supplement (doi:10.5194/essd-2022-72), 2022-03-07
Supplement: Supplementary file 1 [file essd-2022-72-supplement.pdf]

## S 1. Classification of GAEZ crops and crop groups adapted based on Fischer et al. (2021)

| GAEZ crop               | FAO item code                                                                                                                                                                                                                             | Crop group     |
|-------------------------|-------------------------------------------------------------------------------------------------------------------------------------------------------------------------------------------------------------------------------------------|----------------|
| Banana                  | 486                                                                                                                                                                                                                                       | Fruits & nuts  |
| Barley                  | 44                                                                                                                                                                                                                                        | Cereals        |
| Cassava                 | 125                                                                                                                                                                                                                                       | Roots & tubers |
| Cotton                  | 328                                                                                                                                                                                                                                       | Cotton         |
| Fodder crops            | 639, 640, 643, 637, 638, 641, 645, 647, 651, 655                                                                                                                                                                                          | Fodder crops   |
| Fruits and nuts         | 217, 220, 222, 225, 234, 249, 490, 495, 507, 515, 521, 526, 534, 536, 558, 560, 567, 568, 571, 572, 574, 577, 587, 592, 603, 619, 491, 492, 493, 494, 497, 512, 569, 591, 600, 523, 530, 531, 541, 542, 544, 547, 549, 550, 552, 554, 489 | Fruits & nuts  |
| Groundnut               | 242                                                                                                                                                                                                                                       | Oilcrops       |
| Maize                   | 56                                                                                                                                                                                                                                        | Cereals        |
| Millet                  | 79                                                                                                                                                                                                                                        | Cereals        |
| Oil palm                | 254                                                                                                                                                                                                                                       | Oilcrops       |
| Olive                   | 260                                                                                                                                                                                                                                       | Oilcrops       |
| Other cereals           | 71, 75, 89, 108, 68, 92, 94, 97, 101, 103                                                                                                                                                                                                 | Cereals        |
| Potato and sweet potato | 116, 122                                                                                                                                                                                                                                  | Roots & tubers |
| Pulses                  | 176, 181, 187, 191, 195, 201, 211, 203, 205, 210, 197                                                                                                                                                                                     | Pulses         |
| Rapeseed                | 270, 292                                                                                                                                                                                                                                  | Oilcrops       |
| Rest of crops           | 161, 280, 289, 333, 339, 687, 689, 720, 723, 777, 782, 788, 789, 263, 265, 275, 296, 299, 336, 773, 780, 800, 809, 821, 216, 221, 223, 224, 226, 671, 677, 692, 693, 698, 702, 711, 748, 754, 836, 839, 277, 305, 310                     | Rest           |
| Sorghum                 | 83                                                                                                                                                                                                                                        | Cereals        |
| Soybean                 | 236                                                                                                                                                                                                                                       | Oilcrops       |
| Stimulants              | 656, 661, 667                                                                                                                                                                                                                             | Stimulates     |
| Sugar beet              | 157                                                                                                                                                                                                                                       | Sugar crops    |
| Sugar cane              | 156                                                                                                                                                                                                                                       | Sugar crops    |
| Sunflower               | 267                                                                                                                                                                                                                                       | Oilcrops       |
| Tobacco                 | 826                                                                                                                                                                                                                                       | Stimulates     |
| Vegetables              | 358, 372, 373, 388, 393, 394, 397, 399, 402, 406, 423, 426, 446, 449, 463, 366, 367, 401, 407, 414, 417, 420, 430, 459, 461, 1735                                                                                                         | Vegetables     |
| Wetland rice            | 27                                                                                                                                                                                                                                        | Cereals        |
| Wheat                   | 15                                                                                                                                                                                                                                        | Cereals        |
| Yams and other roots    | 135, 136, 137, 149                                                                                                                                                                                                                        | Roots & tubers |

## S 2. Classification of SPAM crops and crop groups adapted based on Yu et al. (2020)

| SPAM crop | Crop long name  | FAO item code                                                                                                                    | Crop group     |
|-----------|-----------------|----------------------------------------------------------------------------------------------------------------------------------|----------------|
| acof      | Arabica Coffee  | 656                                                                                                                              | Stimulates     |
| bana      | Banana          | 486                                                                                                                              | Fruits         |
| barl      | Barley          | 44                                                                                                                               | Cereals        |
| bean      | Bean            | 176                                                                                                                              | Pulses         |
| cass      | Cassava         | 125                                                                                                                              | Roots & tubers |
| chic      | Chickpea        | 191                                                                                                                              | Pulses         |
| cnut      | Coconut         | 249                                                                                                                              | Oilcrops       |
| coco      | Cocoa           | 661                                                                                                                              | Stimulates     |
| cott      | Cotton          | 328                                                                                                                              | Fibres         |
| cowp      | Cowpea          | 195                                                                                                                              | Pulses         |
| grou      | Groundnut       | 242                                                                                                                              | Oilcrops       |
| lent      | Lentil          | 201                                                                                                                              | Pulses         |
| maiz      | Maize           | 56                                                                                                                               | Cereals        |
| ocer      | Other Cereals   | 68, 71, 75, 89, 92, 94, 97, 101, 103, 108                                                                                        | Cereals        |
| ofib      | Other Fibre     | 773, 777, 780, 782, 788, 789, 800, 809, 821                                                                                      | Fibres         |
|           | Crops           |                                                                                                                                  |                |
| oilp      | Oilpalm         | 254                                                                                                                              | Oilcrops       |
| ooil      | Other Oil Crops | 260, 263, 265, 275, 277, 280, 296, 299, 333, 336, 339, 305, 310                                                                  | Oilcrops       |
| opul      | Other Pulses    | 181, 187, 203, 205, 210, 211                                                                                                     | Pulses         |
| orts      | Other Roots     | 135, 136, 149                                                                                                                    | Roots & tubers |
| pige      | Pigeon Pea      | 197                                                                                                                              | Pulses         |
| plnt      | Plantain        | 489                                                                                                                              | Fruits         |
| pmil      | Pearl Millet    | 79                                                                                                                               | Cereals        |
| pota      | Potato          | 116                                                                                                                              | Roots & tubers |
| rape      | Rapeseed        | 270, 292                                                                                                                         | Oilcrops       |
| rcof      | Robusta Coffee  | 656                                                                                                                              | Stimulates     |
| rest      | Rest Of Crops   | 161, 216, 217, 220, 221, 222, 223, 224, 225, 226, 234, 671, 677, 687, 689, 692, 693, 698, 702, 711, 720, 723, 748, 754, 836, 839 | Rest           |
| rice      | Rice            | 27                                                                                                                               | Cereals        |
| sesa      | Sesame Seed     | 289                                                                                                                              | Oilcrops       |
| smil      | Small Millet    | 79                                                                                                                               | Cereals        |
| sorg      | Sorghum         | 83                                                                                                                               | Cereals        |
| soyb      | Soybean         | 236                                                                                                                              | Oilcrops       |
| sugb      | Sugarbeet       | 157                                                                                                                              | Sugar crops    |
| sugc      | Sugarcane       | 156                                                                                                                              | Sugar crops    |
| sunf      | Sunflower       | 267                                                                                                                              | Oilcrops       |

---

|      |                 |                                                                                                                                         |                |
|------|-----------------|-----------------------------------------------------------------------------------------------------------------------------------------|----------------|
| swpo | Sweet Potato    | 122                                                                                                                                     | Roots & tubers |
| teas | Tea             | 667                                                                                                                                     | Stimulates     |
| temf | Temperate Fruit | 515, 521, 523, 526, 530, 531, 534, 536, 541, 542,<br>544, 547, 549, 550, 552, 554, 558, 560, 592, 619                                   | Fruits         |
| toba | Tobacco         | 826                                                                                                                                     | Stimulates     |
| trof | Tropical Fruit  | 490, 491, 492, 493, 494, 495, 497, 507, 512, 567,<br>568, 569, 571, 572, 574, 577, 587, 591, 600, 603                                   | Fruits         |
| vege | Vegetables      | 358, 366, 367, 372, 373, 388, 393, 394, 397, 399,<br>401, 402, 406, 407, 414, 417, 420, 423, 426, 430,<br>446, 449, 459, 461, 463, 1735 | Vegetables     |
| whea | Wheat           | 15                                                                                                                                      | Cereals        |
| yams | Yams            | 137                                                                                                                                     | Roots & tubers |

---

**S 3. List of eleven household surveys to estimate the percentage of irrigated area per farm size from RuLIS (Fao, 2021)**

| Country                     | Year | Survey                                                                     |
|-----------------------------|------|----------------------------------------------------------------------------|
| Albania                     | 2005 | Living Standard Measurement Survey                                         |
| Cambodia                    | 2009 | Cambodia Social-Economic Survey                                            |
| Ethiopia                    | 2014 | Ethiopia Socioeconomic Survey                                              |
| India                       | 2012 | India Human Development survey                                             |
| Malawi                      | 2011 | Integrated Household Survey                                                |
| Mali                        | 2014 | Enquête Agricole de conjoncture integree aux Conditions de Vie des Menages |
| Niger                       | 2011 | National Survey on Household Living Conditions and Agriculture             |
| Nigeria                     | 2013 | General Household Survey                                                   |
| Timor-Leste                 | 2008 | Survey of Living Standards                                                 |
| United Republic of Tanzania | 2009 | National Panel Survey                                                      |
| Uganda                      | 2010 | The Uganda National Panel Survey                                           |

**S 4. Percentage of the irrigated area by farm size in the eleven countries based on household survey and our downscaled maps**

| Country  | Farm size  | 0 - 1 | 1 - 2 | 2 - 5 | 5 - 10 | 10 - 20 | 20 - 50 | 50 - 100 | 100 - 200 | 200 - 500 | 500 - 1000 | > 1000 |
|----------|------------|-------|-------|-------|--------|---------|---------|----------|-----------|-----------|------------|--------|
| Albania  | Survey     | 55.2% | 36.4% | 25.5% |        |         |         |          |           |           |            |        |
|          | SPAM based | 26.2% | 30.4% | 26.8% | 33.2%  | 38.2%   | 3.9%    | 55.8%    |           |           |            |        |
|          | GAEZ based | 47.3% | 46.2% | 47.8% | 44.8%  | 43.8%   | 47.4%   | 88.9%    |           |           |            |        |
| Cambodia | Survey     | 49.1% | 43.6% | 42.7% | 29.0%  |         |         |          |           |           |            |        |
|          | SPAM based | 24.2% | 19.4% | 18.3% | 21.3%  | 21.5%   | 14.0%   | 21.5%    | 11.1%     | 10.5%     |            |        |
|          | GAEZ based | 31.2% | 19.5% | 16.1% | 13.3%  | 8.4%    | 17.1%   | 5.5%     | 10.7%     | 4.5%      |            |        |
| Ethiopia | Survey     | 5.1%  | 3.1%  | 2.4%  | 2.9%   |         |         |          |           |           |            |        |
|          | SPAM based | 1.5%  | 1.1%  | 1.0%  | 1.1%   | 6.5%    | 4.3%    | 6.9%     | 0.9%      | 3.6%      | 1.9%       | 3.1%   |
|          | GAEZ based | 3.0%  | 2.2%  | 1.8%  | 1.4%   | 5.5%    | 9.9%    | 40.9%    | 8.5%      | 2.9%      | 2.5%       | 3.2%   |
| India    | Survey     | 62.5% | 64.5% | 70.7% | 76.8%  | 74.1%   | 55.9%   |          |           |           |            |        |
|          | SPAM based | 41.3% | 33.0% | 31.8% | 30.5%  | 30.8%   | 26.7%   | 26.7%    | 21.3%     | 17.3%     | 33.1%      | 31.1%  |
|          | GAEZ based | 48.3% | 41.7% | 42.7% | 44.1%  | 46.3%   | 42.8%   | 45.3%    | 33.5%     | 45.0%     | 52.0%      | 18.5%  |
| Malawi   | Survey     | 1.8%  | 2.6%  | 2.6%  |        |         |         |          |           |           |            |        |
|          | SPAM based | 0.5%  | 0.9%  | 0.1%  |        |         | 0.1%    |          |           |           |            |        |
|          | GAEZ based | 1.8%  | 2.8%  | 3.2%  |        |         |         |          |           |           |            |        |
| Mali     | Survey     | 39.0% | 26.6% | 12.3% | 7.3%   | 4.7%    | 1.7%    |          |           |           |            |        |
|          | SPAM based | 27.4% | 25.8% | 19.7% | 9.6%   | 14.2%   | 4.9%    | 9.5%     | 4.1%      | 2.2%      | 31.6%      | 5.5%   |
|          | GAEZ based | 56.1% | 33.9% | 15.9% | 8.0%   | 9.1%    | 3.9%    | 7.0%     | 5.8%      | 2.2%      | 15.3%      | 53.1%  |
| Niger    | Survey     | 19.4% | 10.5% | 3.8%  | 2.0%   | 1.6%    | 0.1%    |          |           |           |            |        |
|          | SPAM based | 0.0%  | 0.1%  | 0.0%  |        |         | 0.0%    |          |           |           |            |        |
|          | GAEZ based | 2.4%  | 0.8%  | 1.5%  | 4.9%   | 4.7%    | 0.6%    | 0.7%     | 1.7%      | 15.8%     |            |        |
| Nigeria  | Survey     | 1.8%  | 1.8%  | 0.6%  | 0.0%   |         |         |          |           |           |            |        |

---

|                             |            |       |       |       |      |       |      |      |      |        |      |      |
|-----------------------------|------------|-------|-------|-------|------|-------|------|------|------|--------|------|------|
|                             | SPAM based | 1.8%  | 0.9%  | 0.8%  | 0.5% | 2.5%  | 1.8% | 0.1% | 0.6% | 0.6%   | 0.9% | 0.4% |
|                             | GAEZ based | 0.5%  | 0.4%  | 0.4%  | 0.2% | 0.4%  | 0.3% | 0.4% | 0.1% | 0.1%   |      | 0.2% |
| Timor-Leste                 | Survey     | 12.5% | 8.3%  | 7.1%  |      |       |      |      |      |        |      |      |
|                             | SPAM based | 22.7% | 11.0% | 14.9% | 2.7% | 18.6% |      |      |      | 64.7%  |      |      |
|                             | GAEZ based | 20.6% | 9.1%  | 20.3% | 0.8% | 6.7%  |      |      |      | 100.0% |      |      |
| United Republic of Tanzania | Survey     | 4.0%  | 2.9%  | 3.0%  | 2.8% | 1.0%  |      |      |      |        |      |      |
|                             | SPAM based | 1.8%  | 1.2%  | 1.0%  | 1.1% | 1.0%  | 1.7% | 1.5% | 1.3% | 1.8%   | 2.5% | 1.5% |
|                             | GAEZ based | 5.2%  | 2.4%  | 1.5%  | 1.6% | 1.2%  | 0.8% | 0.7% | 0.9% | 1.6%   | 0.8% | 0.0% |
| Uganda                      | Survey     | 0.6%  | 1.0%  | 0.9%  | 0.0% |       |      |      |      |        |      |      |
|                             | SPAM based | 1.0%  | 0.7%  | 4.8%  | 1.7% | 1.0%  |      |      |      |        |      |      |
|                             | GAEZ based | 0.0%  | 0.2%  | 0.6%  | 1.0% | 0.0%  |      |      |      |        |      |      |

---

**S 5. Percentage of the harvested area by farm size from Lowder's dataset (Lowder et al., 2016) and our downscaled maps**

| Country        |            | 0-1   | 1-2   | 2-5   | 5-10  | 10-20 | 20-50 | 50-100 | 100-200 | 200-500 | 500-1000 | >1000 |
|----------------|------------|-------|-------|-------|-------|-------|-------|--------|---------|---------|----------|-------|
| Albania        | Lowder's   | 6.8%  | 10.5% | 82.7% | 0.0%  | 0.0%  | 0.0%  | 0.0%   | 0.0%    | 0.0%    | 0.0%     | 0.0%  |
|                | SPAM based | 16.1% | 27.9% | 38.3% | 9.4%  | 6.4%  | 1.1%  | 0.8%   | 0.0%    | 0.0%    | 0.0%     | 0.0%  |
|                | GAEZ based | 12.3% | 25.4% | 45.7% | 10.2% | 5.3%  | 0.8%  | 0.4%   | 0.0%    | 0.0%    | 0.0%     | 0.0%  |
| Austria        | Lowder's   | 0.0%  | 2.2%  | 5.3%  | 9.7%  | 17.8% | 24.0% | 9.6%   | 31.5%   | 0.0%    | 0.0%     | 0.0%  |
|                | SPAM based | 0.0%  | 0.6%  | 1.4%  | 3.5%  | 10.2% | 34.9% | 30.6%  | 18.7%   | 0.0%    | 0.0%     | 0.0%  |
|                | GAEZ based | 0.0%  | 0.5%  | 1.9%  | 4.4%  | 13.3% | 38.0% | 26.9%  | 14.8%   | 0.0%    | 0.0%     | 0.0%  |
| Belgium        | Lowder's   | 0.0%  | 0.9%  | 2.2%  | 4.4%  | 10.8% | 38.6% | 29.8%  | 13.4%   | 0.0%    | 0.0%     | 0.0%  |
|                | SPAM based | 0.0%  | 0.0%  | 0.7%  | 2.6%  | 8.2%  | 30.3% | 32.4%  | 25.8%   | 0.0%    | 0.0%     | 0.0%  |
|                | GAEZ based | 0.0%  | 0.1%  | 0.7%  | 2.4%  | 7.1%  | 29.2% | 34.9%  | 25.7%   | 0.0%    | 0.0%     | 0.0%  |
| Brazil         | Lowder's   | 0.1%  | 0.2%  | 0.7%  | 1.3%  | 2.8%  | 7.2%  | 7.8%   | 9.3%    | 14.3%   | 11.4%    | 45.1% |
|                | SPAM based | 1.4%  | 1.8%  | 4.1%  | 4.1%  | 7.1%  | 10.5% | 7.2%   | 7.3%    | 10.7%   | 9.5%     | 36.3% |
|                | GAEZ based | 1.1%  | 1.4%  | 3.4%  | 3.7%  | 6.0%  | 10.8% | 7.9%   | 7.3%    | 11.1%   | 10.2%    | 37.0% |
| Bulgaria       | Lowder's   | 6.6%  | 0.0%  | 8.3%  | 0.0%  | 0.0%  | 6.6%  | 78.5%  | 0.0%    | 0.0%    | 0.0%     | 0.0%  |
|                | SPAM based | 2.4%  | 0.0%  | 2.2%  | 1.7%  | 2.2%  | 4.1%  | 4.4%   | 82.9%   | 0.0%    | 0.0%     | 0.0%  |
|                | GAEZ based | 3.2%  | 0.0%  | 2.6%  | 2.0%  | 2.8%  | 4.7%  | 5.0%   | 79.7%   | 0.0%    | 0.0%     | 0.0%  |
| Burkina Faso   | Lowder's   | 1.8%  | 7.4%  | 34.6% | 36.7% | 19.5% | 0.0%  | 0.0%   | 0.0%    | 0.0%    | 0.0%     | 0.0%  |
|                | SPAM based | 0.3%  | 1.6%  | 7.3%  | 10.1% | 11.0% | 17.7% | 10.5%  | 10.4%   | 11.5%   | 3.1%     | 16.5% |
|                | GAEZ based | 0.3%  | 1.5%  | 7.3%  | 10.1% | 11.0% | 17.7% | 10.5%  | 10.4%   | 11.5%   | 3.2%     | 16.4% |
| Colombia       | Lowder's   | 0.4%  | 0.8%  | 2.7%  | 4.0%  | 6.2%  | 13.6% | 14.8%  | 14.9%   | 22.9%   | 19.8%    | 0.0%  |
|                | SPAM based | 6.9%  | 11.8% | 28.5% | 18.3% | 16.2% | 10.7% | 2.0%   | 1.5%    | 4.0%    | 0.0%     | 0.0%  |
|                | GAEZ based | 7.1%  | 11.8% | 27.8% | 19.7% | 16.1% | 10.9% | 1.3%   | 1.4%    | 3.8%    | 0.0%     | 0.0%  |
| Croatia        | Lowder's   | 5.9%  | 7.4%  | 19.9% | 21.1% | 15.1% | 30.5% | 0.0%   | 0.0%    | 0.0%    | 0.0%     | 0.0%  |
|                | SPAM based | 2.7%  | 2.8%  | 12.4% | 12.4% | 12.0% | 16.8% | 12.7%  | 28.2%   | 0.0%    | 0.0%     | 0.0%  |
|                | GAEZ based | 2.7%  | 2.8%  | 14.5% | 13.6% | 13.3% | 16.7% | 11.4%  | 24.9%   | 0.0%    | 0.0%     | 0.0%  |
| Cyprus         | Lowder's   | 6.4%  | 6.8%  | 14.4% | 12.6% | 13.6% | 16.4% | 11.5%  | 18.4%   | 0.0%    | 0.0%     | 0.0%  |
|                | SPAM based | 11.7% | 11.8% | 16.7% | 10.2% | 9.3%  | 14.1% | 9.8%   | 16.5%   | 0.0%    | 0.0%     | 0.0%  |
|                | GAEZ based | 9.3%  | 9.2%  | 14.7% | 10.7% | 11.0% | 16.7% | 11.9%  | 16.5%   | 0.0%    | 0.0%     | 0.0%  |
| Czech Republic | Lowder's   | 0.1%  | 0.3%  | 0.8%  | 1.2%  | 2.0%  | 3.7%  | 3.5%   | 4.2%    | 8.0%    | 15.2%    | 60.8% |

|          |            |       |       |       |       |       |       |       |       |       |       |       |
|----------|------------|-------|-------|-------|-------|-------|-------|-------|-------|-------|-------|-------|
|          | SPAM based | 0.2%  | 0.1%  | 0.7%  | 0.7%  | 1.4%  | 3.5%  | 4.3%  | 4.4%  | 8.0%  | 15.2% | 61.5% |
|          | GAEZ based | 0.2%  | 0.1%  | 0.2%  | 0.6%  | 1.3%  | 3.3%  | 4.0%  | 4.4%  | 8.2%  | 15.5% | 62.2% |
| Denmark  | Lowder's   | 0.0%  | 0.1%  | 0.2%  | 2.8%  | 6.4%  | 20.8% | 29.7% | 40.0% | 0.0%  | 0.0%  | 0.0%  |
|          | SPAM based | 0.0%  | 0.0%  | 0.0%  | 0.9%  | 2.7%  | 9.8%  | 14.9% | 71.7% | 0.0%  | 0.0%  | 0.0%  |
|          | GAEZ based | 0.0%  | 0.0%  | 0.1%  | 1.8%  | 3.5%  | 9.6%  | 14.6% | 70.4% | 0.0%  | 0.0%  | 0.0%  |
| Estonia  | Lowder's   | 0.5%  | 2.2%  | 6.0%  | 8.7%  | 12.3% | 14.4% | 7.6%  | 48.2% | 0.0%  | 0.0%  | 0.0%  |
|          | SPAM based | 0.1%  | 0.1%  | 0.5%  | 1.0%  | 1.9%  | 4.5%  | 6.1%  | 85.9% | 0.0%  | 0.0%  | 0.0%  |
|          | GAEZ based | 0.0%  | 0.1%  | 0.6%  | 1.2%  | 2.2%  | 5.8%  | 7.1%  | 83.0% | 0.0%  | 0.0%  | 0.0%  |
| Ethiopia | Lowder's   | 27.1% | 33.3% | 32.6% | 5.5%  | 1.4%  | 0.0%  | 0.0%  | 0.0%  | 0.0%  | 0.0%  | 0.0%  |
|          | SPAM based | 35.5% | 35.9% | 25.5% | 2.5%  | 0.1%  | 0.1%  | 0.0%  | 0.0%  | 0.4%  | 0.0%  | 0.0%  |
|          | GAEZ based | 35.9% | 35.7% | 25.5% | 2.2%  | 0.1%  | 0.1%  | 0.0%  | 0.0%  | 0.4%  | 0.0%  | 0.0%  |
| Finland  | Lowder's   | 0.0%  | 1.1%  | 2.9%  | 7.1%  | 18.6% | 42.6% | 20.4% | 7.3%  | 0.0%  | 0.0%  | 0.0%  |
|          | SPAM based | 0.1%  | 0.1%  | 0.1%  | 1.0%  | 4.9%  | 24.8% | 33.7% | 35.3% | 0.1%  | 0.1%  | 0.0%  |
|          | GAEZ based | 0.1%  | 0.0%  | 0.4%  | 1.9%  | 6.7%  | 26.8% | 33.1% | 30.9% | 0.0%  | 0.0%  | 0.0%  |
| France   | Lowder's   | 0.0%  | 0.7%  | 1.3%  | 1.9%  | 4.2%  | 17.3% | 30.6% | 44.0% | 0.0%  | 0.0%  | 0.0%  |
|          | SPAM based | 0.0%  | 0.2%  | 0.5%  | 0.9%  | 2.2%  | 8.5%  | 21.2% | 66.6% | 0.0%  | 0.0%  | 0.0%  |
|          | GAEZ based | 0.0%  | 0.2%  | 0.6%  | 0.9%  | 2.1%  | 9.9%  | 25.2% | 61.1% | 0.0%  | 0.0%  | 0.0%  |
| Germany  | Lowder's   | 0.0%  | 0.3%  | 2.1%  | 3.7%  | 8.3%  | 22.4% | 21.4% | 12.2% | 8.1%  | 6.2%  | 15.4% |
|          | SPAM based | 0.3%  | 0.2%  | 0.8%  | 1.2%  | 3.8%  | 11.3% | 18.3% | 19.0% | 12.5% | 9.3%  | 23.3% |
|          | GAEZ based | 0.1%  | 0.1%  | 0.3%  | 1.2%  | 4.0%  | 13.1% | 22.0% | 17.4% | 11.5% | 8.7%  | 21.6% |
| Greece   | Lowder's   | 0.0%  | 11.4% | 20.6% | 20.4% | 19.1% | 18.3% | 5.8%  | 4.4%  | 0.0%  | 0.0%  | 0.0%  |
|          | SPAM based | 0.0%  | 11.2% | 20.1% | 20.3% | 19.3% | 20.2% | 6.4%  | 2.6%  | 0.0%  | 0.0%  | 0.0%  |
|          | GAEZ based | 0.1%  | 10.6% | 19.8% | 20.1% | 19.6% | 20.7% | 6.5%  | 2.6%  | 0.0%  | 0.0%  | 0.0%  |
| India    | Lowder's   | 18.7% | 20.2% | 31.2% | 16.7% | 8.3%  | 4.9%  | 0.0%  | 0.0%  | 0.0%  | 0.0%  | 0.0%  |
|          | SPAM based | 23.7% | 22.5% | 30.6% | 14.0% | 5.9%  | 2.9%  | 0.3%  | 0.0%  | 0.0%  | 0.0%  | 0.0%  |
|          | GAEZ based | 24.8% | 23.0% | 30.9% | 13.5% | 5.2%  | 2.4%  | 0.3%  | 0.0%  | 0.0%  | 0.0%  | 0.0%  |
| Ireland  | Lowder's   | 0.0%  | 0.1%  | 0.8%  | 3.0%  | 11.5% | 39.6% | 29.0% | 16.0% | 0.0%  | 0.0%  | 0.0%  |
|          | SPAM based | 0.4%  | 0.1%  | 0.1%  | 0.7%  | 3.1%  | 19.5% | 32.4% | 43.6% | 0.1%  | 0.0%  | 0.0%  |
|          | GAEZ based | 0.1%  | 0.0%  | 0.3%  | 1.3%  | 5.9%  | 27.5% | 33.1% | 31.8% | 0.0%  | 0.0%  | 0.0%  |
| Italy    | Lowder's   | 2.4%  | 3.6%  | 8.5%  | 9.3%  | 11.2% | 16.1% | 10.9% | 37.9% | 0.0%  | 0.0%  | 0.0%  |
|          | SPAM based | 2.2%  | 3.2%  | 11.9% | 13.3% | 15.4% | 21.6% | 14.9% | 17.5% | 0.0%  | 0.0%  | 0.0%  |



|             |            |       |       |       |       |       |       |       |       |       |       |       |
|-------------|------------|-------|-------|-------|-------|-------|-------|-------|-------|-------|-------|-------|
| Latvia      | GAEZ based | 1.7%  | 2.5%  | 10.1% | 11.6% | 15.4% | 23.5% | 16.2% | 19.0% | 0.0%  | 0.0%  | 0.0%  |
|             | Lowder's   | 0.0%  | 0.4%  | 3.3%  | 8.0%  | 17.5% | 31.0% | 18.0% | 9.4%  | 5.7%  | 6.7%  | 0.0%  |
|             | SPAM based | 0.0%  | 0.5%  | 1.5%  | 2.5%  | 4.8%  | 8.2%  | 8.6%  | 73.8% | 0.0%  | 0.0%  | 0.0%  |
| Lithuania   | GAEZ based | 0.0%  | 0.3%  | 1.7%  | 4.3%  | 8.9%  | 14.1% | 11.2% | 59.4% | 0.0%  | 0.0%  | 0.0%  |
|             | Lowder's   | 0.0%  | 1.1%  | 13.9% | 15.1% | 17.7% | 17.2% | 8.3%  | 6.2%  | 6.2%  | 14.3% | 0.0%  |
|             | SPAM based | 0.1%  | 0.9%  | 4.8%  | 5.1%  | 6.3%  | 10.0% | 12.5% | 14.0% | 13.9% | 32.3% | 0.0%  |
| Luxembourg  | GAEZ based | 0.0%  | 1.2%  | 6.0%  | 6.7%  | 7.9%  | 13.8% | 14.0% | 11.6% | 11.6% | 27.0% | 0.1%  |
|             | Lowder's   | 0.0%  | 0.3%  | 0.9%  | 1.6%  | 2.7%  | 15.3% | 50.7% | 28.6% | 0.0%  | 0.0%  | 0.0%  |
|             | SPAM based | 0.8%  | 0.2%  | 0.5%  | 1.6%  | 2.2%  | 8.4%  | 29.7% | 56.4% | 0.2%  | 0.0%  | 0.0%  |
| Malta       | GAEZ based | 0.0%  | 0.1%  | 0.2%  | 0.8%  | 1.2%  | 7.3%  | 32.7% | 57.6% | 0.1%  | 0.0%  | 0.0%  |
|             | Lowder's   | 33.1% | 24.9% | 29.0% | 9.6%  | 3.3%  | 0.0%  | 0.0%  | 0.0%  | 0.0%  | 0.0%  | 0.0%  |
|             | SPAM based | 20.4% | 15.2% | 38.8% | 18.6% | 7.1%  | 0.0%  | 0.0%  | 0.0%  | 0.0%  | 0.0%  | 0.0%  |
| Netherlands | GAEZ based | 22.5% | 16.9% | 35.7% | 17.1% | 6.7%  | 1.1%  | 0.0%  | 0.0%  | 0.0%  | 0.0%  | 0.0%  |
|             | Lowder's   | 0.0%  | 1.0%  | 2.7%  | 5.5%  | 12.2% | 42.6% | 21.9% | 14.1% | 0.0%  | 0.0%  | 0.0%  |
|             | SPAM based | 0.1%  | 0.1%  | 0.8%  | 2.5%  | 6.7%  | 24.3% | 33.0% | 32.5% | 0.0%  | 0.0%  | 0.0%  |
| Norway      | GAEZ based | 0.0%  | 0.1%  | 1.1%  | 3.3%  | 7.7%  | 32.1% | 34.7% | 20.9% | 0.0%  | 0.0%  | 0.0%  |
|             | Lowder's   | 0.0%  | 0.3%  | 3.6%  | 11.7% | 31.0% | 42.8% | 8.9%  | 1.4%  | 0.2%  | 0.0%  | 0.0%  |
|             | SPAM based | 0.3%  | 0.1%  | 0.6%  | 3.7%  | 13.4% | 35.7% | 27.8% | 16.3% | 1.8%  | 0.1%  | 0.1%  |
| Panama      | GAEZ based | 0.2%  | 0.0%  | 1.1%  | 5.6%  | 17.7% | 43.8% | 22.1% | 8.6%  | 0.9%  | 0.0%  | 0.0%  |
|             | Lowder's   | 0.6%  | 1.0%  | 2.7%  | 3.7%  | 7.2%  | 17.5% | 17.8% | 15.2% | 15.0% | 6.5%  | 12.7% |
|             | SPAM based | 6.4%  | 1.9%  | 1.5%  | 3.0%  | 4.2%  | 16.9% | 18.5% | 15.1% | 19.9% | 12.5% | 0.0%  |
| Paraguay    | GAEZ based | 6.4%  | 1.7%  | 5.1%  | 6.4%  | 7.3%  | 18.1% | 17.2% | 13.6% | 15.1% | 9.0%  | 0.0%  |
|             | Lowder's   | 0.0%  | 0.1%  | 0.8%  | 1.8%  | 3.4%  | 3.6%  | 2.1%  | 2.4%  | 4.4%  | 4.2%  | 77.1% |
|             | SPAM based | 0.2%  | 0.8%  | 2.5%  | 4.6%  | 5.8%  | 5.2%  | 4.9%  | 7.9%  | 15.4% | 12.8% | 40.0% |
| Peru        | GAEZ based | 0.2%  | 1.3%  | 4.0%  | 7.2%  | 8.6%  | 7.0%  | 5.8%  | 5.9%  | 12.2% | 10.8% | 37.0% |
|             | Lowder's   | 0.0%  | 0.0%  | 5.4%  | 5.0%  | 4.4%  | 7.5%  | 77.6% | 0.0%  | 0.0%  | 0.0%  | 0.0%  |
|             | SPAM based | 7.2%  | 36.5% | 1.4%  | 18.9% | 14.0% | 12.0% | 4.6%  | 1.7%  | 1.4%  | 0.7%  | 1.7%  |
| Poland      | GAEZ based | 7.5%  | 38.7% | 2.1%  | 19.4% | 13.7% | 10.4% | 3.7%  | 1.6%  | 0.9%  | 0.6%  | 1.3%  |
|             | Lowder's   | 2.8%  | 4.6%  | 12.6% | 18.1% | 21.4% | 15.5% | 4.9%  | 2.7%  | 4.4%  | 4.2%  | 8.8%  |
|             | SPAM based | 1.1%  | 1.8%  | 9.9%  | 16.1% | 20.7% | 20.0% | 9.5%  | 2.9%  | 4.7%  | 4.5%  | 8.8%  |
|             | GAEZ based | 1.1%  | 1.8%  | 9.8%  | 14.8% | 19.6% | 21.0% | 10.0% | 3.0%  | 4.9%  | 4.7%  | 9.3%  |

|                          |            |       |       |       |       |       |       |       |       |       |       |       |
|--------------------------|------------|-------|-------|-------|-------|-------|-------|-------|-------|-------|-------|-------|
| Portugal                 | Lowder's   | 2.8%  | 6.4%  | 10.5% | 8.6%  | 9.7%  | 9.8%  | 7.0%  | 45.3% | 0.0%  | 0.0%  | 0.0%  |
|                          | SPAM based | 3.1%  | 7.0%  | 14.8% | 12.6% | 11.7% | 14.0% | 9.4%  | 27.3% | 0.0%  | 0.0%  | 0.0%  |
|                          | GAEZ based | 1.9%  | 4.2%  | 10.2% | 9.8%  | 11.1% | 14.8% | 9.2%  | 38.9% | 0.0%  | 0.0%  | 0.0%  |
| Romania                  | Lowder's   | 4.9%  | 8.1%  | 20.2% | 11.1% | 3.9%  | 2.0%  | 1.7%  | 48.1% | 0.0%  | 0.0%  | 0.0%  |
|                          | SPAM based | 4.9%  | 8.1%  | 15.1% | 7.8%  | 3.9%  | 4.1%  | 3.7%  | 52.1% | 0.1%  | 0.1%  | 0.1%  |
|                          | GAEZ based | 5.0%  | 8.2%  | 17.6% | 10.1% | 5.1%  | 4.9%  | 4.0%  | 45.0% | 0.0%  | 0.0%  | 0.0%  |
| Sweden                   | Lowder's   | 0.0%  | 1.6%  | 3.9%  | 9.3%  | 13.8% | 24.8% | 22.2% | 24.5% | 0.0%  | 0.0%  | 0.0%  |
|                          | SPAM based | 0.1%  | 0.1%  | 0.1%  | 0.4%  | 1.9%  | 8.6%  | 16.7% | 72.1% | 0.0%  | 0.0%  | 0.0%  |
|                          | GAEZ based | 0.0%  | 0.0%  | 1.0%  | 3.3%  | 6.1%  | 13.9% | 19.0% | 56.6% | 0.0%  | 0.0%  | 0.0%  |
| Uganda                   | Lowder's   | 11.0% | 15.8% | 24.8% | 18.2% | 30.2% | 0.0%  | 0.0%  | 0.0%  | 0.0%  | 0.0%  | 0.0%  |
|                          | SPAM based | 54.9% | 26.4% | 15.9% | 1.5%  | 0.6%  | 0.5%  | 0.0%  | 0.0%  | 0.0%  | 0.0%  | 0.0%  |
|                          | GAEZ based | 55.6% | 25.7% | 16.5% | 1.0%  | 0.7%  | 0.4%  | 0.0%  | 0.1%  | 0.1%  | 0.0%  | 0.0%  |
| United Kingdom           | Lowder's   | 0.0%  | 0.3%  | 0.5%  | 1.3%  | 2.9%  | 10.1% | 16.4% | 68.6% | 0.0%  | 0.0%  | 0.0%  |
|                          | SPAM based | 0.0%  | 0.0%  | 0.0%  | 0.1%  | 0.5%  | 3.9%  | 11.4% | 84.0% | 0.0%  | 0.0%  | 0.0%  |
|                          | GAEZ based | 0.0%  | 0.0%  | 0.0%  | 0.3%  | 0.9%  | 4.9%  | 13.0% | 80.9% | 0.0%  | 0.0%  | 0.0%  |
| United States of America | Lowder's   | 0.0%  | 0.0%  | 0.1%  | 0.4%  | 1.1%  | 3.9%  | 6.4%  | 9.0%  | 16.4% | 62.6% | 0.0%  |
|                          | SPAM based | 0.2%  | 0.1%  | 0.1%  | 0.1%  | 0.2%  | 1.6%  | 3.8%  | 8.1%  | 22.1% | 63.6% | 0.1%  |
|                          | GAEZ based | 0.1%  | 0.0%  | 0.2%  | 0.2%  | 0.3%  | 1.8%  | 3.9%  | 7.9%  | 21.4% | 64.2% | 0.1%  |
| Uruguay                  | Lowder's   | 0.0%  | 0.0%  | 0.1%  | 0.3%  | 0.6%  | 1.7%  | 2.9%  | 5.5%  | 13.2% | 16.6% | 59.1% |
|                          | SPAM based | 0.6%  | 0.0%  | 0.2%  | 0.0%  | 0.1%  | 0.3%  | 0.9%  | 2.7%  | 9.5%  | 13.0% | 72.6% |
|                          | GAEZ based | 0.6%  | 0.0%  | 0.2%  | 0.1%  | 0.1%  | 0.4%  | 1.0%  | 2.3%  | 10.0% | 16.8% | 68.6% |

**S 6. Number and percentage of the grid cells that have similar, larger, and smaller dominant farm size in our downscaled maps than Mehrabi's map (Mehrabi et al., 2020)**

| Country                | Number of pixels |        |         |         |        |         | Percentage of Pixels |        |         |         |        |         |
|------------------------|------------------|--------|---------|---------|--------|---------|----------------------|--------|---------|---------|--------|---------|
|                        | SPAM             |        |         | GAEZ    |        |         | SPAM                 |        |         | GAEZ    |        |         |
|                        | similar          | larger | smaller | similar | larger | smaller | similar              | larger | smaller | similar | larger | smaller |
| Albania                | 339              | 47     | 84      | 352     | 39     | 37      | 72.1%                | 10.0%  | 17.9%   | 82.2%   | 9.1%   | 8.6%    |
| Austria                | 390              | 244    | 170     | 343     | 233    | 221     | 48.5%                | 30.3%  | 21.1%   | 43.0%   | 29.2%  | 27.7%   |
| Belgium                | 404              | 99     | 88      | 386     | 103    | 56      | 68.4%                | 16.8%  | 14.9%   | 70.8%   | 18.9%  | 10.3%   |
| Burkina Faso           | 820              | 2001   | 66      | 662     | 2277   | 49      | 28.4%                | 69.3%  | 2.3%    | 22.2%   | 76.2%  | 1.6%    |
| Bulgaria               | 1288             | 358    | 35      | 1249    | 341    | 24      | 76.6%                | 21.3%  | 2.1%    | 77.4%   | 21.1%  | 1.5%    |
| Bosnia and Herzegovina | 302              | 423    | 16      | 203     | 589    | 8       | 40.8%                | 57.1%  | 2.2%    | 25.4%   | 73.6%  | 1.0%    |
| Brazil                 | 18218            | 3912   | 21303   | 21956   | 6891   | 20596   | 41.9%                | 9.0%   | 49.0%   | 44.4%   | 13.9%  | 41.7%   |
| Colombia               | 998              | 408    | 3276    | 1145    | 468    | 3715    | 21.3%                | 8.7%   | 70.0%   | 21.5%   | 8.8%   | 69.7%   |
| Costa Rica             | 46               | 363    | 14      | 30      | 396    | 1       | 10.9%                | 85.8%  | 3.3%    | 7.0%    | 92.7%  | 0.2%    |
| Cyprus                 | 19               | 86     | 0       | 27      | 78     | 0       | 18.1%                | 81.9%  | 0.0%    | 25.7%   | 74.3%  | 0.0%    |
| Czechia                | 878              | 289    | 74      | 964     | 310    | 106     | 70.7%                | 23.3%  | 6.0%    | 69.9%   | 22.5%  | 7.7%    |
| Germany                | 2769             | 1810   | 1574    | 2784    | 2085   | 1462    | 45.0%                | 29.4%  | 25.6%   | 44.0%   | 32.9%  | 23.1%   |
| Denmark                | 704              | 128    | 20      | 647     | 109    | 23      | 82.6%                | 15.0%  | 2.3%    | 83.1%   | 14.0%  | 3.0%    |
| Spain                  | 917              | 5837   | 96      | 752     | 6014   | 88      | 13.4%                | 85.2%  | 1.4%    | 11.0%   | 87.7%  | 1.3%    |
| Estonia                | 474              | 369    | 3       | 468     | 365    | 38      | 56.0%                | 43.6%  | 0.4%    | 53.7%   | 41.9%  | 4.4%    |
| Ethiopia               | 4172             | 477    | 885     | 3647    | 494    | 740     | 75.4%                | 8.6%   | 16.0%   | 74.7%   | 10.1%  | 15.2%   |
| Finland                | 137              | 1593   | 11      | 188     | 1608   | 5       | 7.9%                 | 91.5%  | 0.6%    | 10.4%   | 89.3%  | 0.3%    |
| France                 | 6506             | 984    | 357     | 6850    | 1127   | 130     | 82.9%                | 12.5%  | 4.5%    | 84.5%   | 13.9%  | 1.6%    |
| United Kingdom         | 2475             | 182    | 202     | 3070    | 236    | 158     | 86.6%                | 6.4%   | 7.1%    | 88.6%   | 6.8%   | 4.6%    |
| Ghana                  | 477              | 1809   | 0       | 540     | 2112   | 1       | 20.9%                | 79.1%  | 0.0%    | 20.4%   | 79.6%  | 0.0%    |
| Greece                 | 866              | 491    | 307     | 862     | 552    | 255     | 52.0%                | 29.5%  | 18.4%   | 51.6%   | 33.1%  | 15.3%   |
| Croatia                | 256              | 464    | 62      | 249     | 495    | 58      | 32.7%                | 59.3%  | 7.9%    | 31.0%   | 61.7%  | 7.2%    |
| Hungary                | 719              | 535    | 23      | 754     | 639    | 46      | 56.3%                | 41.9%  | 1.8%    | 52.4%   | 44.4%  | 3.2%    |
| India                  | 23358            | 8820   | 4237    | 23511   | 8250   | 4359    | 64.1%                | 24.2%  | 11.6%   | 65.1%   | 22.8%  | 12.1%   |
| Ireland                | 713              | 212    | 139     | 777     | 231    | 135     | 67.0%                | 19.9%  | 13.1%   | 68.0%   | 20.2%  | 11.8%   |

|                             |       |       |       |       |       |      |       |       |       |       |       |       |
|-----------------------------|-------|-------|-------|-------|-------|------|-------|-------|-------|-------|-------|-------|
| Italy                       | 1641  | 1236  | 1051  | 1684  | 1472  | 913  | 41.8% | 31.5% | 26.8% | 41.4% | 36.2% | 22.4% |
| Cambodia                    | 362   | 1103  | 3     | 603   | 1245  | 30   | 24.7% | 75.1% | 0.2%  | 32.1% | 66.3% | 1.6%  |
| Lithuania                   | 379   | 746   | 178   | 373   | 602   | 313  | 29.1% | 57.3% | 13.7% | 29.0% | 46.7% | 24.3% |
| Luxembourg                  | 25    | 1     | 0     | 46    | 1     | 0    | 96.2% | 3.8%  | 0.0%  | 97.9% | 2.1%  | 0.0%  |
| Latvia                      | 518   | 498   | 158   | 581   | 401   | 302  | 44.1% | 42.4% | 13.5% | 45.2% | 31.2% | 23.5% |
| Mexico                      | 7899  | 3055  | 2822  | 8526  | 3115  | 2783 | 57.3% | 22.2% | 20.5% | 59.1% | 21.6% | 19.3% |
| Mali                        | 296   | 3698  | 0     | 225   | 4274  | 4    | 7.4%  | 92.6% | 0.0%  | 5.0%  | 94.9% | 0.1%  |
| Mongolia                    | 83    | 18    | 65    | 556   | 466   | 425  | 50.0% | 10.8% | 39.2% | 38.4% | 32.2% | 29.4% |
| Malawi                      | 732   | 104   | 0     | 799   | 167   | 0    | 87.6% | 12.4% | 0.0%  | 82.7% | 17.3% | 0.0%  |
| Niger                       | 1843  | 1424  | 107   | 2050  | 1385  | 113  | 54.6% | 42.2% | 3.2%  | 57.8% | 39.0% | 3.2%  |
| Nigeria                     | 6164  | 3759  | 1     | 6580  | 3812  | 2    | 62.1% | 37.9% | 0.0%  | 63.3% | 36.7% | 0.0%  |
| Netherlands                 | 340   | 161   | 79    | 375   | 165   | 82   | 58.6% | 27.8% | 13.6% | 60.3% | 26.5% | 13.2% |
| Norway                      | 99    | 243   | 33    | 131   | 293   | 14   | 26.4% | 64.8% | 8.8%  | 29.9% | 66.9% | 3.2%  |
| Panama                      | 192   | 111   | 153   | 207   | 116   | 218  | 42.1% | 24.3% | 33.6% | 38.3% | 21.4% | 40.3% |
| Peru                        | 691   | 294   | 2533  | 1127  | 483   | 3721 | 19.6% | 8.4%  | 72.0% | 21.1% | 9.1%  | 69.8% |
| Poland                      | 2728  | 1709  | 1244  | 2697  | 1754  | 1352 | 48.0% | 30.1% | 21.9% | 46.5% | 30.2% | 23.3% |
| Portugal                    | 623   | 332   | 171   | 626   | 474   | 94   | 55.3% | 29.5% | 15.2% | 52.4% | 39.7% | 7.9%  |
| Paraguay                    | 932   | 83    | 766   | 1289  | 107   | 838  | 52.3% | 4.7%  | 43.0% | 57.7% | 4.8%  | 37.5% |
| Romania                     | 1640  | 1207  | 515   | 1674  | 1234  | 565  | 48.8% | 35.9% | 15.3% | 48.2% | 35.5% | 16.3% |
| Russian Federation          | 28678 | 12171 | 9310  | 38082 | 15146 | 9041 | 57.2% | 24.3% | 18.6% | 61.2% | 24.3% | 14.5% |
| Slovakia                    | 494   | 141   | 1     | 551   | 173   | 6    | 77.7% | 22.2% | 0.2%  | 75.5% | 23.7% | 0.8%  |
| Slovenia                    | 21    | 142   | 0     | 34    | 211   | 0    | 12.9% | 87.1% | 0.0%  | 13.9% | 86.1% | 0.0%  |
| Sweden                      | 655   | 1148  | 15    | 617   | 1128  | 54   | 36.0% | 63.1% | 0.8%  | 34.3% | 62.7% | 3.0%  |
| Tajikistan                  | 170   | 650   | 20    | 215   | 705   | 14   | 20.2% | 77.4% | 2.4%  | 23.0% | 75.5% | 1.5%  |
| Timor-Leste                 | 144   | 4     | 0     | 159   | 5     | 1    | 97.3% | 2.7%  | 0.0%  | 96.4% | 3.0%  | 0.6%  |
| United Republic of Tanzania | 1679  | 3706  | 5     | 2328  | 5416  | 5    | 31.2% | 68.8% | 0.1%  | 30.0% | 69.9% | 0.1%  |
| Uganda                      | 1047  | 109   | 946   | 1072  | 86    | 1074 | 49.8% | 5.2%  | 45.0% | 48.0% | 3.9%  | 48.1% |
| Uruguay                     | 1124  | 250   | 295   | 1521  | 339   | 139  | 67.3% | 15.0% | 17.7% | 76.1% | 17.0% | 7.0%  |
| United States of America    | 46349 | 17045 | 10691 | 51825 | 20422 | 6516 | 62.6% | 23.0% | 14.4% | 65.8% | 25.9% | 8.3%  |
| South Africa                | 1044  | 78    | 6869  | 870   | 60    | 6459 | 13.1% | 1.0%  | 86.0% | 11.8% | 0.8%  | 87.4% |

|       |        |       |       |        |        |       |       |       |       |       |       |       |
|-------|--------|-------|-------|--------|--------|-------|-------|-------|-------|-------|-------|-------|
| Total | 176837 | 87167 | 71073 | 199839 | 101299 | 67389 | 52.8% | 26.0% | 21.2% | 54.2% | 27.5% | 18.3% |
|-------|--------|-------|-------|--------|--------|-------|-------|-------|-------|-------|-------|-------|

## Reference

FAO: RuLIS - Rural Livelihoods Information System, 2021.

Fischer, G., Nachtergaele, F. O., van Velthuisen, H., Chiozza, F., Francheschini, G., Henry, M., Muchoney, D., and Tramberend, S.: Global Agro-ecological Zones (GAEZ v4)-Model Documentation, FAO Rome, Italy, 2021.

Lowder, S. K., Scoet, J., and Raney, T.: The Number, Size, and Distribution of Farms, Smallholder Farms, and Family Farms Worldwide, *World Development*, 87, 16-29, 10.1016/j.worlddev.2015.10.041, 2016.

Mehrabi, Z., McDowell, M. J., Ricciardi, V., Levers, C., Martinez, J. D., Mehrabi, N., Wittman, H., Ramankutty, N., and Jarvis, A.: The global divide in data-driven farming, *Nature Sustainability*, 4, 154-160, 10.1038/s41893-020-00631-0, 2020.

Yu, Q., You, L., Wood-Sichra, U., Ru, Y., Joglekar, A. K. B., Fritz, S., Xiong, W., Lu, M., Wu, W., and Yang, P.: A cultivated planet in 2010 – Part 2: The global gridded agricultural-production maps, *Earth System Science Data*, 12, 3545-3572, 10.5194/essd-12-3545-2020, 2020.
